# Supplementary material for: Synthesis of component-controllable monolayer MoxW(1−x)S2ySe2(1−y) alloys with continuously tunable band gap and carrier type
Source: Royal Society of Chemistry journal article supplement (doi:10.1039/d3ra07065d), 2023-01-01
Supplement: d3ra07065d1.pdf [file d3ra07065d1.pdf]

Supporting Information

**Synthesis of Component-Controllable Monolayer  
 $\text{Mo}_x\text{W}_{(1-x)}\text{S}_{2y}\text{Se}_{2(1-y)}$  Alloys with Continuously Tunable  
Band Gap and Carrier Type**

You Li<sup>1,2</sup>, Kangkang Wang<sup>2</sup>, Yiwen Wang<sup>1</sup>, Wenbin Huang, Junqi Wang<sup>1</sup>, Qichao Yang<sup>1</sup>, Ziyue Qian<sup>2</sup>, Honggang Wang<sup>2</sup>, Junyi Liao<sup>2</sup>, Sabir Hussain<sup>2</sup>, Liming Xie<sup>2</sup> and Junjie Qi<sup>1\*</sup>

<sup>1</sup> *School of Materials Science and Engineering, University of Science and Technology  
Beijing, Beijing 100083, PR China*

<sup>2</sup> *School of Nanoscience and Technology, University of Chinese Academy of Sciences,  
Beijing 100049, PR China*

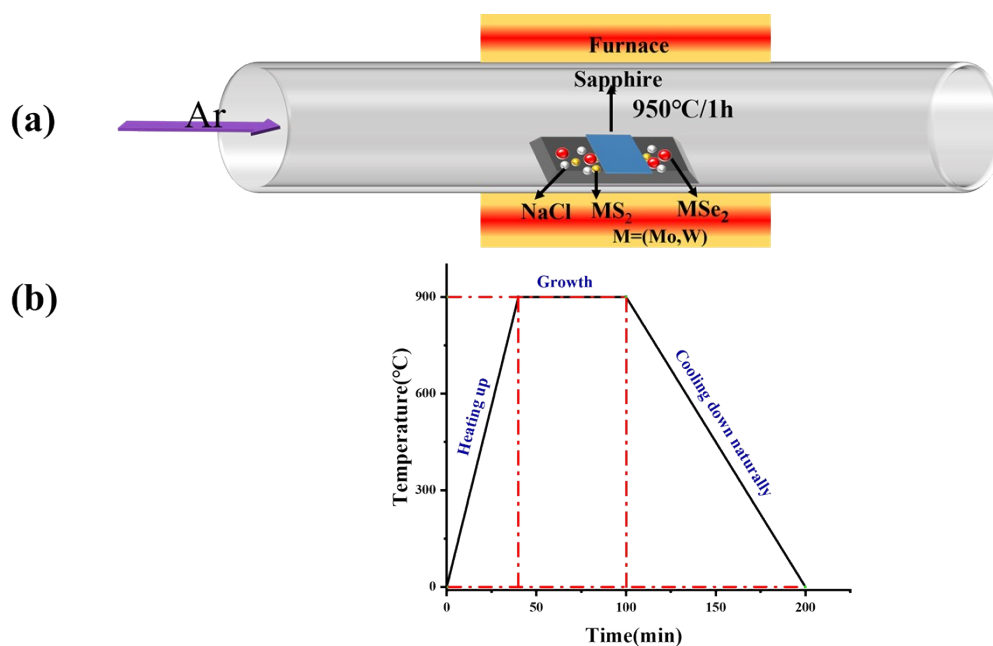

Figure S1. (a) Schematic illustration of the single-heating-zone furnace for the synthesis of monolayer  $\text{Mo}_x\text{W}_{(1-x)}\text{S}_{2y}\text{Se}_{2(1-y)}$  alloys. (b) Temperature profiles of the samples during growth.

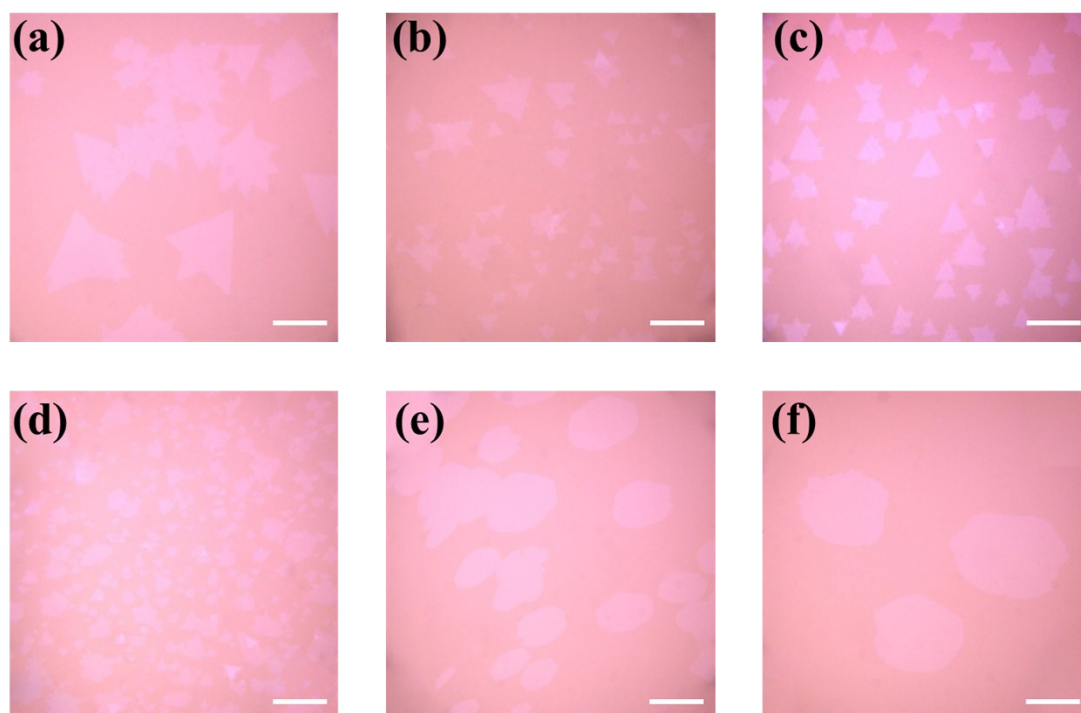

Figure S2. OM images of monolayer  $\text{Mo}_x\text{W}_{(1-x)}\text{S}_{2y}\text{Se}_{2(1-y)}$  alloys. (a)  $\text{Mo}_{0.82}\text{W}_{0.18}\text{S}_{0.28}\text{Se}_{1.72}$ ; (b)  $\text{Mo}_{0.69}\text{W}_{0.31}\text{S}_{0.62}\text{Se}_{1.38}$ ; (c)  $\text{Mo}_{0.50}\text{W}_{0.50}\text{S}_{0.92}\text{Se}_{1.08}$ ; (d)  $\text{Mo}_{0.39}\text{W}_{0.61}\text{S}_{1.20}\text{Se}_{0.80}$ ; (e)  $\text{Mo}_{0.26}\text{W}_{0.74}\text{S}_{1.44}\text{Se}_{0.56}$ ; (f)  $\text{Mo}_{0.10}\text{W}_{0.90}\text{S}_{1.64}\text{Se}_{0.36}$ . Scale bar 100  $\mu\text{m}$ .

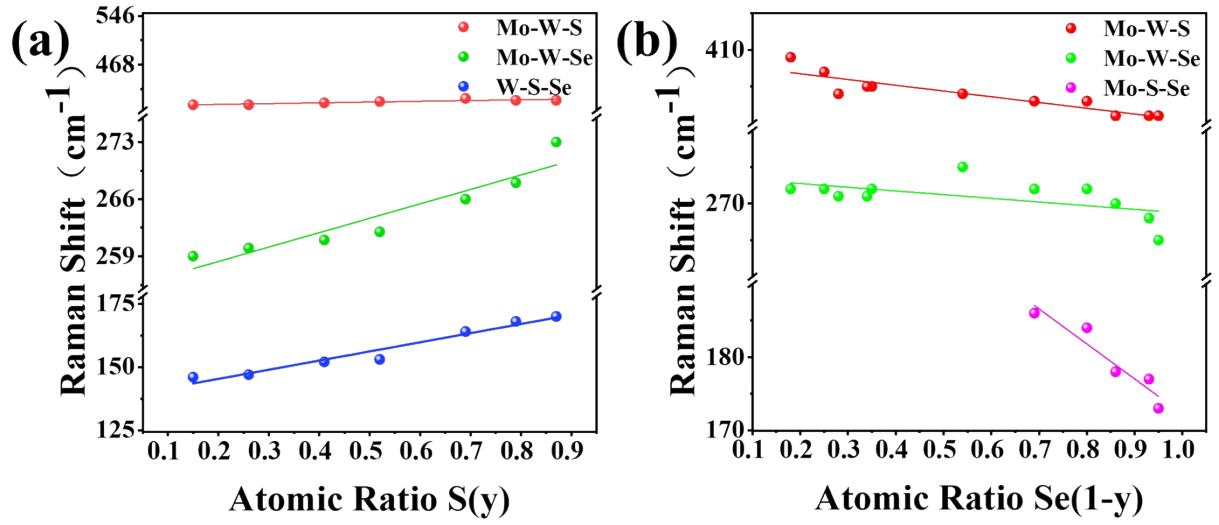

Figure S3. (a) Composition-dependent Raman frequencies of  $\text{Mo}_x\text{W}_{(1-x)}\text{S}_{2y}\text{Se}_{2(1-y)}$  with different weight ratios of  $\text{MoS}_2$  and  $\text{WSe}_2$  as growth sources. (b) Composition-dependent Raman frequencies of  $\text{Mo}_x\text{W}_{(1-x)}\text{S}_{2y}\text{Se}_{2(1-y)}$  with different weight ratios of  $\text{MoSe}_2$  and  $\text{WS}_2$  as growth sources.

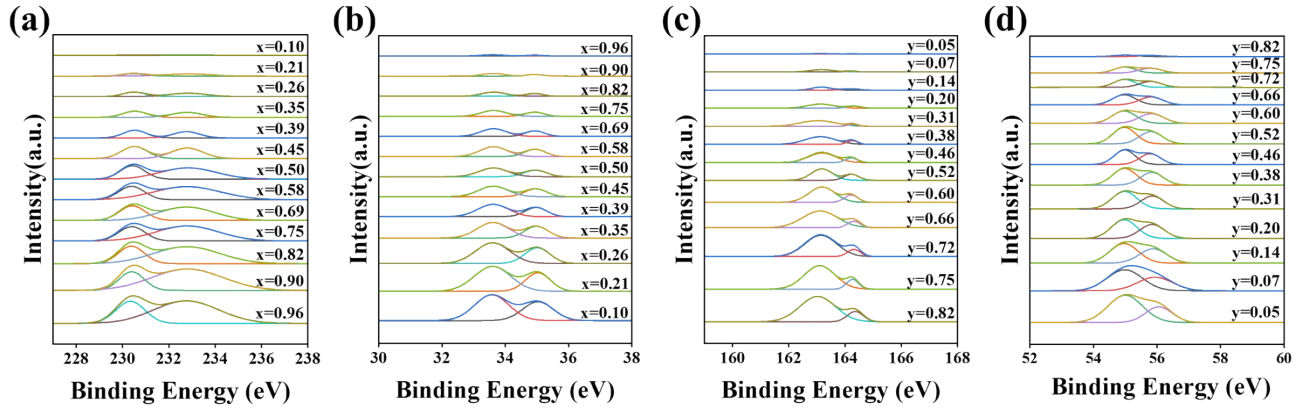

Figure S4. Composition-dependent XPS spectra of monolayer  $\text{Mo}_x\text{W}_{(1-x)}\text{S}_{2y}\text{Se}_{2(1-y)}$  alloys with different weight ratios of  $\text{MoS}_2$  and  $\text{WSe}_2$  as growth source. (a) Mo 3d, (b) W 4f, (c) S 2p and (d) Se 3d.

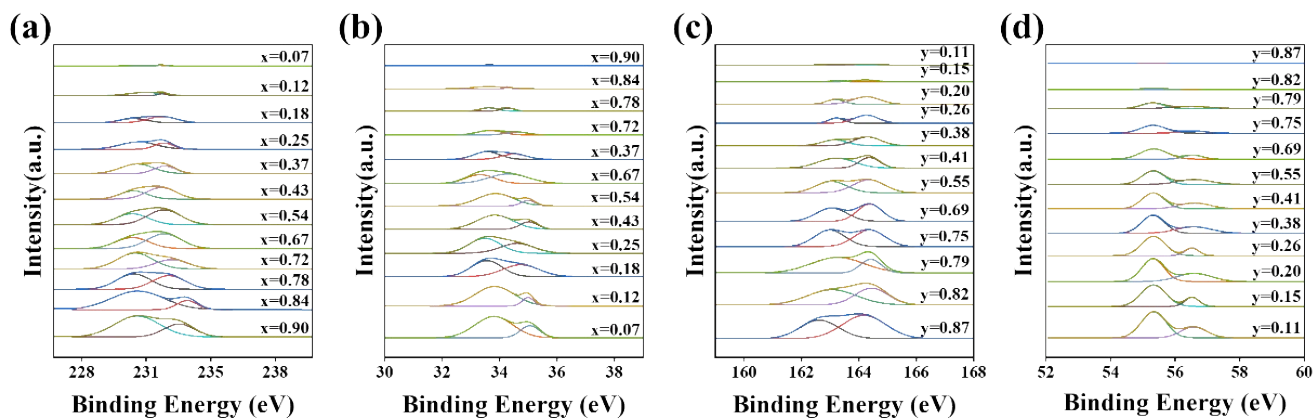

Figure S5. Composition-dependent XPS spectra of monolayer  $\text{Mo}_x\text{W}_{(1-x)}\text{S}_{2y}\text{Se}_{2(1-y)}$  alloys with different weight ratios of  $\text{MoSe}_2$  and  $\text{WS}_2$  as growth source. (a) Mo 3d, (b) W 4f, (c) S 2p and (d) Se 3d.

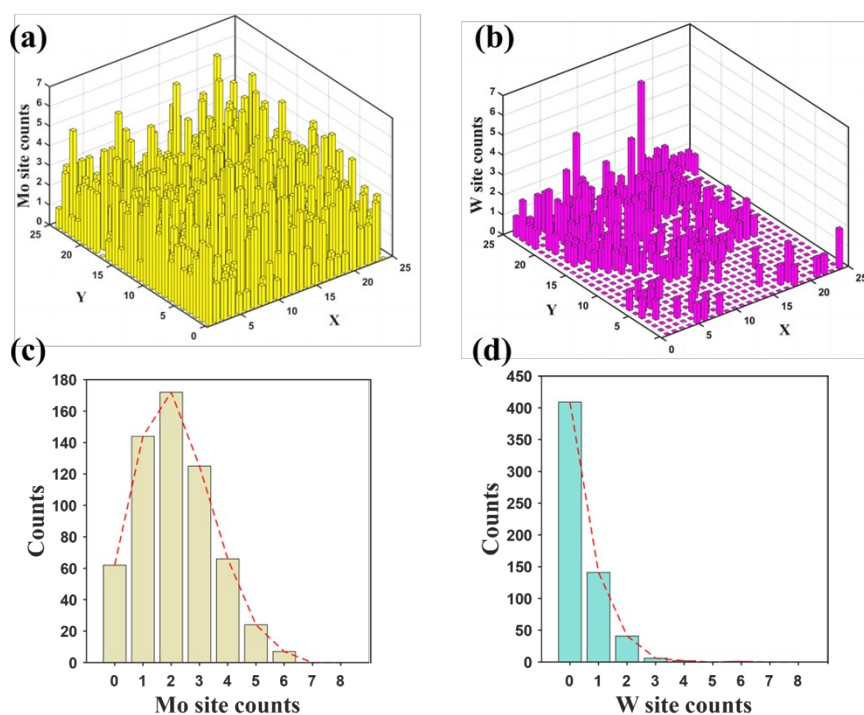

Figure S6. STEM analysis of monolayer  $\text{Mo}_x\text{W}_{(1-x)}\text{S}_{2y}\text{Se}_{2(1-y)}$  alloy. (a-b) The site distribution histograms of Mo and W in monolayer  $\text{Mo}_{0.82}\text{W}_{0.18}\text{S}_{0.28}\text{Se}_{1.72}$  alloy, respectively. The image was divided into  $25 \times 25$  parts. (c-d) The corresponding statistical histograms of Mo-site and W-site counts in each part of STEM image.

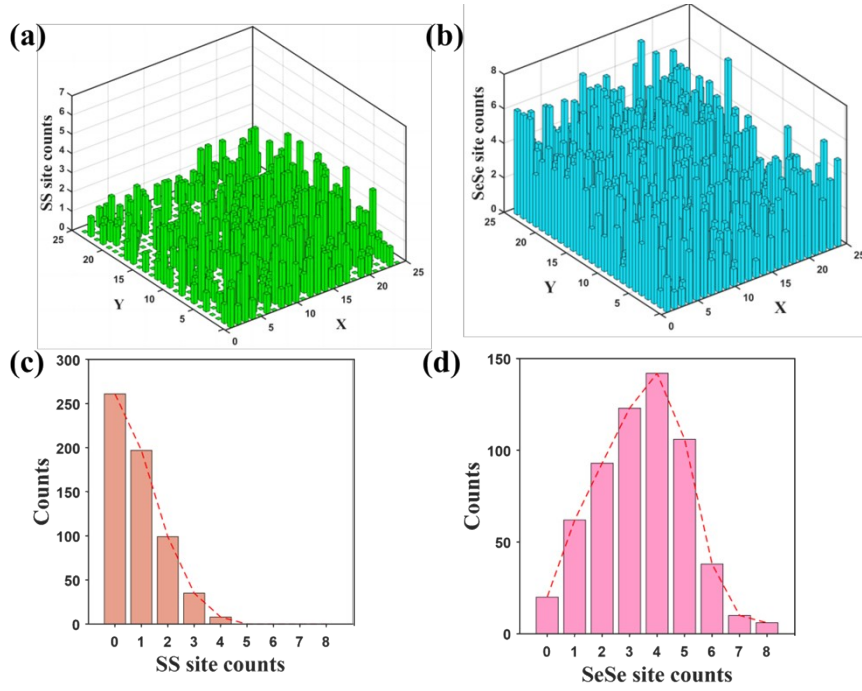

Figure S7. STEM analysis of monolayer  $\text{Mo}_x\text{W}_{(1-x)}\text{S}_{2y}\text{Se}_{2(1-y)}$  alloy. (a-b) The site distribution histograms of SS and SeSe in monolayer  $\text{Mo}_{0.82}\text{W}_{0.18}\text{S}_{0.28}\text{Se}_{1.72}$  alloy, respectively. The image was divided into  $25 \times 25$  parts. (c-d) The corresponding statistical histograms of SS-site and SeSe-site counts in each part of STEM image.

Table S1. Summary of monolayer  $\text{Mo}_x\text{W}_{(1-x)}\text{S}_{2y}\text{Se}_{2(1-y)}$  alloys synthesized with  $\text{MoS}_2$  and  $\text{WSe}_2$ .

| Mass Ratio                                          | Atomic Ratio Mo(x) | Atomic Ratio S(y) |
|-----------------------------------------------------|--------------------|-------------------|
| $\frac{m_{\text{MoS}_2}}{m_{\text{WSe}_2}} = 9:1$   | 0.90               | 0.87              |
| $\frac{m_{\text{MoS}_2}}{m_{\text{WSe}_2}} = 7.5:1$ | 0.84               | 0.82              |
| $\frac{m_{\text{MoS}_2}}{m_{\text{WSe}_2}} = 6:1$   | 0.78               | 0.79              |
| $\frac{m_{\text{MoS}_2}}{m_{\text{WSe}_2}} = 4.5:1$ | 0.72               | 0.75              |
| $\frac{m_{\text{MoS}_2}}{m_{\text{WSe}_2}} = 3:1$   | 0.67               | 0.69              |
| $\frac{m_{\text{MoS}_2}}{m_{\text{WSe}_2}} = 1:1$   | 0.54               | 0.55              |
| $\frac{m_{\text{MoS}_2}}{m_{\text{WSe}_2}} = 1:2$   | 0.43               | 0.41              |
| $\frac{m_{\text{MoS}_2}}{m_{\text{WSe}_2}} = 1:3$   | 0.37               | 0.38              |
| $\frac{m_{\text{MoS}_2}}{m_{\text{WSe}_2}} = 1:4.5$ | 0.25               | 0.26              |
| $\frac{m_{\text{MoS}_2}}{m_{\text{WSe}_2}} = 1:6$   | 0.18               | 0.20              |
| $\frac{m_{\text{MoS}_2}}{m_{\text{WSe}_2}} = 1:7.5$ | 0.12               | 0.15              |
| $\frac{m_{\text{MoS}_2}}{m_{\text{WSe}_2}} = 1:9$   | 0.07               | 0.11              |

Table S2. Summary of monolayer  $\text{Mo}_x\text{W}_{(1-x)}\text{S}_{2y}\text{Se}_{2(1-y)}$  alloys synthesized with  $\text{MoSe}_2$  and  $\text{WS}_2$ .

| Mass Ratio                                                        | Atomic Ratio Mo(x) | Atomic Ratio S(y) |
|-------------------------------------------------------------------|--------------------|-------------------|
| $\frac{\text{m}_{\text{MoSe}_2}}{\text{m}_{\text{WS}_2}} = 9:1$   | 0.96               | 0.05              |
| $\frac{\text{m}_{\text{MoSe}_2}}{\text{m}_{\text{WS}_2}} = 7.5:1$ | 0.90               | 0.07              |
| $\frac{\text{m}_{\text{MoSe}_2}}{\text{m}_{\text{WS}_2}} = 6:1$   | 0.82               | 0.14              |
| $\frac{\text{m}_{\text{MoSe}_2}}{\text{m}_{\text{WS}_2}} = 4.5:1$ | 0.75               | 0.20              |
| $\frac{\text{m}_{\text{MoSe}_2}}{\text{m}_{\text{WS}_2}} = 3:1$   | 0.69               | 0.31              |
| $\frac{\text{m}_{\text{MoSe}_2}}{\text{m}_{\text{WS}_2}} = 2:1$   | 0.58               | 0.38              |
| $\frac{\text{m}_{\text{MoSe}_2}}{\text{m}_{\text{WS}_2}} = 1:1$   | 0.50               | 0.46              |
| $\frac{\text{m}_{\text{MoSe}_2}}{\text{m}_{\text{WS}_2}} = 1:2$   | 0.45               | 0.52              |
| $\frac{\text{m}_{\text{MoSe}_2}}{\text{m}_{\text{WS}_2}} = 1:3$   | 0.39               | 0.60              |
| $\frac{\text{m}_{\text{MoSe}_2}}{\text{m}_{\text{WS}_2}} = 1:4.5$ | 0.35               | 0.66              |
| $\frac{\text{m}_{\text{MoSe}_2}}{\text{m}_{\text{WS}_2}} = 1:6$   | 0.26               | 0.72              |
| $\frac{\text{m}_{\text{MoSe}_2}}{\text{m}_{\text{WS}_2}} = 1:7.5$ | 0.21               | 0.75              |
| $\frac{\text{m}_{\text{MoSe}_2}}{\text{m}_{\text{WS}_2}} = 1:9$   | 0.10               | 0.82              |
